# Supplementary material for: EEG-Based Tool for Prediction of University Students’ Cognitive Performance in the Classroom
Source: MDPI journal article supplement (doi:10.3390/brainsci11060698), 2021-05-26
Supplement: s1 [file s1]

- **Primer cuestionario**

1. ¿Qué es la Red CAN?
  - a. Protocolo de interferencia en la comunicación
  - b. Protocolo de comunicación entre módulos electrónicos
  - c. Protocolo de transporte datos de la comunicación
2. Menciona alguna ventaja de utilizarla
  - a. Usar menos cableado
  - b. Posee filtros que aumentan el ruido
  - c. No tiene ventajas
3. Selecciona al menos una información que viaja por esta red
  - a. Datos telefónicos
  - b. Datos de temperatura
  - c. Datos ambientales

- **Segundo cuestionario**

1. ¿Qué es lo que permite la Red CAN?
  - a. Transportar gran cantidad de datos por infinidad de cables
  - b. Transportar gran cantidad de datos por un solo cable
  - c. Transportar por infinidad de cables un solo dato
2. ¿Qué tipo de información viaja por esta red?
  - a. Información sobre temperatura, levanta cristales, presión de aceite
  - b. Información sobre batería, servicio, frenos
  - c. Información sobre potencia, fallas, diesel
3. ¿Cuáles son los principales componentes?
  - a. Controlador, cables multiplexados, terminador
  - b. Comenzador, cables trenzados, finalizador
  - c. Controlador, cables multipolares, router
4. La presencia de un decodificador es una ventaja
  - a. CIERTO
  - b. FALSO
5. Red CAN es un protocolo de comunicación entre módulos
  - a. Eléctricos
  - b. Electrónicos
  - c. Electromagnéticos

- **Tercer cuestionario**

1. Red CAN es un protocolo de comunicación entre módulos
  - a. Eléctricos
  - b. Electrónicos
  - c. Electromagnéticos
2. El principal objetivo es transportar una gran cantidad de datos por infinidad de cables.
  - a. Cierto
  - b. Falso
3. Componente que recibe, codifica y envía la información:
  - a. Terminador
  - b. Controlador
  - c. Cables multiplexados
4. Une con la opción correcta

|                                                                |                      |
|----------------------------------------------------------------|----------------------|
| Se utiliza para cerrar y adecuar el funcionamiento del sistema | Terminador           |
| Ayudan a filtrar el ruido eléctrico                            | Cables multiplexados |
| Recibe, codifica y envía la información                        | Controlador          |

5. ¿Qué porcentaje aproximadamente de cables y conexiones llega a reducir?

- a. Alrededor del 45%
- b. Alrededor del 55%
- c. Alrededor del 35%

6. Red CAN reduce los ruidos eléctricos.

- a. Cierto
- b. Falso

7. Es un tipo señal...

- a. Serial y analógica
- b. Analógica y digital
- c. Serial y digital

8. ¿Qué tipo de cable se utiliza para evitar que el ruido eléctrico u ondas electromagnéticas interfieran en la señal?

- a. Cables aisladores
- b. Cables blindados
- c. Cables trenzados

9. Une con la opción de velocidad de información correcta:

CAN\_L            500kbits/s

CAN\_H            125kbits/s
