# Supplementary material for: EEG-Based Tool for Prediction of University Students’ Cognitive Performance in the Classroom
Source: MDPI journal article supplement (doi:10.3390/brainsci11060698), 2021-05-26
Supplement: s1 [file s1]

# CAN BUS

- All control units communicate through this network (Controller Area Network)

## **What is a CAN BUS? (Controller Area Network)**

It is a communication protocol between electronic modules. This communication allows transporting a large amount of data over a single cable.

## **Who and when created the Network?**

It was first incorporated into a vehicle in 1987 by Intel and Philips, and it is now included in all vehicles.

## **What are the components of the CAN Network?**

### **- Controller (Transmitter and Receiver):**

- These components are the modules (or computers).
- This circuit receives, encodes and sends information.
- Operate in very low current values, usually around 0.5 A.

### **- Multiplexed cables:**

- Cables in charge of relaying this information.
- Filter the electrical noise.

### **- Terminator:**

- Resistive elements used to close and adjust the system's operation.

This type of communication allows a connection between the different "computers" that the vehicle has in a very efficient way. This whole set is called a multiplexed communication system.

The connections must follow certain rules or protocols, this protocol is called CAN (Controller Area Network). Some information that travels through this network are:

- |                                     |                  |
|-------------------------------------|------------------|
| - Engine oil pressure               | - Wheel pressure |
| - Lift windows motor                | - Speed          |
| - Fuel level                        | - Music          |
| - Lights                            | - Free hands     |
| - Interior and exterior temperature |                  |

**Why is this type of communication introduced in vehicles?**

The main advantage for which the CAN Network was installed is that the number of cables and connections inside the vehicle is reduced around "45%". It is a type of serial and digital signal (i.e. they travel as 0 and 1).

In order to achieve this, each unit (or computer) has a decoder that "converts" the signals into 0 and 1. These signals have two wires, CAN H (CAN "High" and CAN L ("Low", which operates between 1.5 to 2.5 V).

This used to isolate each other to prevent electrical noise or electromagnetic waves from interfering with the signal.

**How fast is CAN information transferred?**

The speed with which the data is transmitted is: CAN\_H (or high) = 500 Kbits/s and CAN\_L (or low) 125 Kbits/s and at the end of each cable line (inside each computer) a resistance between them of 120 ohms.
