# Supplementary material for: EEG-Based Tool for Prediction of University Students’ Cognitive Performance in the Classroom
Source: MDPI journal article supplement (doi:10.3390/brainsci11060698), 2021-05-26
Supplement: s1 [file s1]

# RED CAN

- También conocida "CAN BUS"
- Todas las unidades de control, se comunican mediante esta red (Controller Area Network)

## ¿Qué es una Red CAN? (Controller Area Network)

Es un protocolo de comunicación entre módulos electrónicos. Esta comunicación permite transportar gran cantidad de datos por un solo cable.

## ¿Quién y cuándo se creó la Red?

Incorporada en un vehículo por primera vez en 1987 por Intel y Philips, en la actualidad lo poseen todos los vehículos.

## ¿Cuáles son los componentes que tiene la Red CAN?

### - Controlador (Transmisor y Receptor):

- Estos componentes son los módulos (o computadoras).
- Este circuito recibe, codifica y envía la información.
- Manejan un valor de corriente muy bajo, en general es 0.5 A o menos.

### - Cables multiplexados:

- Son los cables encargados de llevar esta información.
- Filtran el ruido eléctrico.

### - Terminador o Cierre:

- Elementos resistivos que se utilizan para cerrar y adecuar el funcionamiento del sistema.

Este tipo de comunicación permite una conexión entre las diversas "computadoras" que tiene el vehículo de manera muy eficiente; a todo este conjunto se le llama sistema multiplexado de comunicación.

Deben seguir ciertas reglas o protocolos, a este protocolo se le llama CAN (Controller Area Network) Algunas informaciones que van por esta red son:

- |                                                |                         |
|------------------------------------------------|-------------------------|
| - Presión de aceite de motor                   | - Presión de neumáticos |
| - Levanta cristales                            | - Velocidad crucero     |
| - Nivel de combustible                         | - Música                |
| - Luces                                        | - Manos libres          |
| - Temperatura interior o exterior del vehículo |                         |

### **¿Por qué se introduce este tipo de comunicación en los vehículos?**

La principal ventaja por la cual se colocó la Red CAN es que se llega a reducir alrededor de un "45%" la cantidad de cables y conexiones dentro del vehículo. Es un tipo de señal serial y digital (es decir, van 0 y 1).

Para poder lograr esto, cada unidad (o computadora) tiene un decodificador que "convierte" las señales en 0 y 1.

Estas señales poseen dos cables, CAN H (CAN alto o "High" y CAN L (Bajo o "Low", que opera entre 1.5 a 2.5 V).

Esto es para justamente aislarse mutuamente para evitar que el ruido eléctrico u ondas electromagnéticas interfieran en la señal.

### **¿A qué velocidad se transfiere la información Can?**

La velocidad con la que se transmiten los datos es: CAN\_H (o alto) = 500 Kbits/s y CAN\_L (o bajo) 125 Kbits/s y al final de cada línea de cables (dentro de cada computador) una resistencia entre ellos de 120 ohms.
